# Supplementary material for: Sensitive electrochemical detection of metabisulphite in gastrointestinal fluids
Source: Royal Society of Chemistry journal article supplement (doi:10.1039/d2an01352e), 2022-01-01
Supplement: d2an01352e1.pdf [file d2an01352e1.pdf]

## Supplementary Information

### Sensitive Electrochemical Detection of Metabisulphite in Gastrointestinal Fluids

Sharmila Durairaj<sup>1</sup>, Qian Guo<sup>2</sup>, Qi Wang<sup>2,\*</sup>, Aicheng Chen<sup>1,\*</sup>

1. Electrochemical Technology Centre, Department of Chemistry, University of Guelph, 50 Stone Road East, Guelph, ON N1G2W1, Canada

2. Agriculture and Agri-Food Canada, 90 Stone Road West, Guelph, ON N1G 5C9, Canada

\* Corresponding authors: qi.wang2@agr.gc.ca (Q. Wang); aicheng@uoguelph.ca (A. Chen).

**Table S1.** Formulations of the stimulated salivary fluid (SSF) and the simulated gastric fluid (SGF) at the specified pH values.

| Constituent                                                                                                               | Stock conc.         |                     | SSF                 |                                      | SGF                 |                                      |
|---------------------------------------------------------------------------------------------------------------------------|---------------------|---------------------|---------------------|--------------------------------------|---------------------|--------------------------------------|
|                                                                                                                           |                     |                     | pH 7                |                                      | pH 3                |                                      |
|                                                                                                                           | g L <sup>-1</sup>   | mol L <sup>-1</sup> | Vol. of stock<br>mL | Conc. in SSF<br>mmol L <sup>-1</sup> | Vol. of stock<br>mL | Conc. in SGF<br>mmol L <sup>-1</sup> |
| KCl                                                                                                                       | 37.3                | 0.5                 | 15.1                | 15.1                                 | 6.9                 | 6.9                                  |
| KH <sub>2</sub> PO <sub>4</sub>                                                                                           | 68                  | 0.5                 | 3.7                 | 3.7                                  | 0.9                 | 0.9                                  |
| NaHCO <sub>3</sub>                                                                                                        | 84                  | 1                   | 6.8                 | 13.6                                 | 12.5                | 25                                   |
| NaCl                                                                                                                      | 117                 | 2                   | —                   | —                                    | 11.8                | 47.2                                 |
| MgCl <sub>2</sub> (H <sub>2</sub> O) <sub>6</sub>                                                                         | 30.5                | 0.15                | 0.5                 | 0.15                                 | 0.4                 | 0.1                                  |
| (NH <sub>4</sub> ) <sub>2</sub> CO <sub>3</sub>                                                                           | 48                  | 0.5                 | 0.06                | 0.06                                 | 0.5                 | 0.5                                  |
| <b>For pH adjustment</b>                                                                                                  |                     |                     |                     |                                      |                     |                                      |
|                                                                                                                           | mol L <sup>-1</sup> |                     | mL                  | mmol L <sup>-1</sup>                 | mL                  | mmol L <sup>-1</sup>                 |
| NaOH                                                                                                                      | 1                   |                     | —                   | —                                    | —                   | —                                    |
| HCl                                                                                                                       | 6                   |                     | 0.09                | 1.1                                  | 1.3                 | 15.6                                 |
| <b>CaCl<sub>2</sub>(H<sub>2</sub>O)<sub>2</sub> is not added to the simulated digestion fluids, see details in legend</b> |                     |                     |                     |                                      |                     |                                      |
|                                                                                                                           | g L <sup>-1</sup>   | mol L <sup>-1</sup> |                     | mmol L <sup>-1</sup>                 |                     | mmol L <sup>-1</sup>                 |
| CaCl <sub>2</sub> (H <sub>2</sub> O) <sub>2</sub>                                                                         | 44.1                | 0.3                 |                     | 1.5 (0.75*)                          |                     | 0.15 (0.075*)                        |

<sup>a</sup> \* in brackets is the corresponding Ca<sup>2+</sup> concentration in the final digestion mixture.

**Table S2.** Comparison of the performance of different electrochemical sensors for the detection of sulphite and bisulphite.

| No | Method          | Sensor<br>Element/Analyte       | Linear range<br>( $\mu\text{M}$ to $\text{mM}$ ) | Sensitivity<br>( $\mu\text{A}/\mu\text{M cm}^{-2}$ ) | LOD<br>( $\mu\text{M}$ ) | Reference |
|----|-----------------|---------------------------------|--------------------------------------------------|------------------------------------------------------|--------------------------|-----------|
| 1  | Electrochemical | Sulfite<br>oxidase/sulphite     | 200 - 1.8                                        | -                                                    | 200                      | S1        |
| 2  | Electrochemical | MWCNT/COOH<br>/Sulphite         | 400 - 4.4                                        | 2.2                                                  | 80                       | S2        |
| 3  | Electrochemical | NiPCNF/Al<br>/Sulphite          | 40 - 4.2                                         | -                                                    | 3                        | S3        |
| 4  | Electrochemical | NiO nanoplate<br>/Sulphite      | 16.2 -0.6                                        | 2.8                                                  | 8.8                      | S4        |
| 5  | Electrochemical | Zn nanoparticles<br>/Bisulphite | 5 - 0.41                                         | -                                                    | -                        | S5        |
| 6  | HPIC            | Bisulphite                      | 3-165 $\mu\text{g/ml}$                           |                                                      |                          | S6        |
| 7  | UV spectroscopy | Bisulphite                      | 50- 375 $\mu\text{g.ml}$                         |                                                      | 1 $\mu\text{g/ml}$       | S7        |
| 8  | Bisulphite      | Au/F-rGO                        | 10 – 1.0                                         | 4.9                                                  | 0.67                     | This work |

High performance ion chromatography

- S1. D.J. Shawk, S.S. Dritz, R.D. Goodband, M.D. Tokach, J.C. Woodworth, J.M. Derouchey, F.A. Sem, H.L. Frobose, M.D. Tokach, E.L. Hansen, L.J. McKinney, J.M. Derouchey, R.D. Goodband, J.L. Nelssen, S.S. Dritz, T. City, D. Moll, D., F. Ahmadi, W.H. Lee, Y.K, Oh, K. Park, W.S. Kwak, *Arch. Anim. Nutr.*, 2019, **389**, 143–152.
- S2. M.H. Pournaghi-Azar, M. Hydarpour, H. Dastango, *Anal. Chim. Acta* 2003, **497**, 133–141.
- S3. R. Rawal, S. Chawla, T. Dahiya, C.S. Pundir, *Anal. Bioanal. Chem.*, 2011, **401**, 2599–2608.
- S4. V. Sudha, S.M. Senthil Kumar, R. Thangamuthu, ., *J. Alloys Compd.* 2018, **749**, 990–999.
- S5. V. Sudha, S.M. Senthil Kumar, R. Thangamuthu, . *J. Alloys Compd.*, 2018, **744**, 621–628.
- S6. K. Wang, E.P.C. Lai, K. Wang, K. Lai, P.C Edward, *Chemosensors*, 2022, **10**, 145-163.
- S7. L. Geiser, E. Varesio, J.L. Veuthey, *J. Pharm. Biomed. Anal.* 31 2003, **31**, 1059– 1064

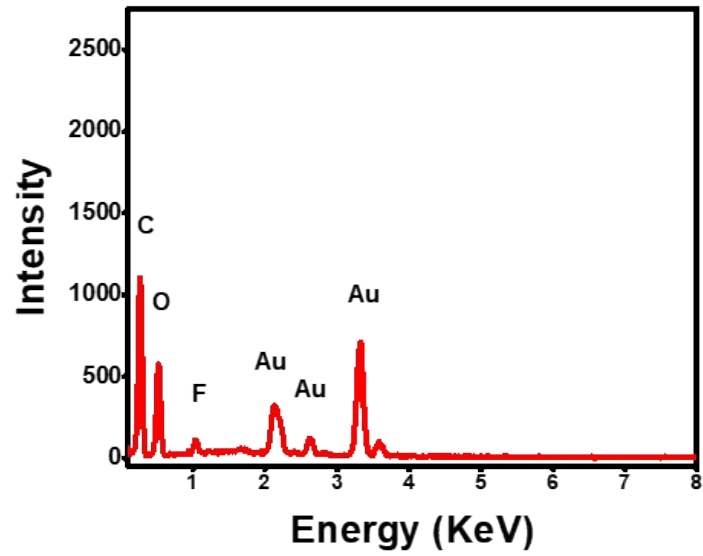

**Figure S1.** Energy-dispersive X-ray spectrum of the Au/F-rGO nanocomposite.

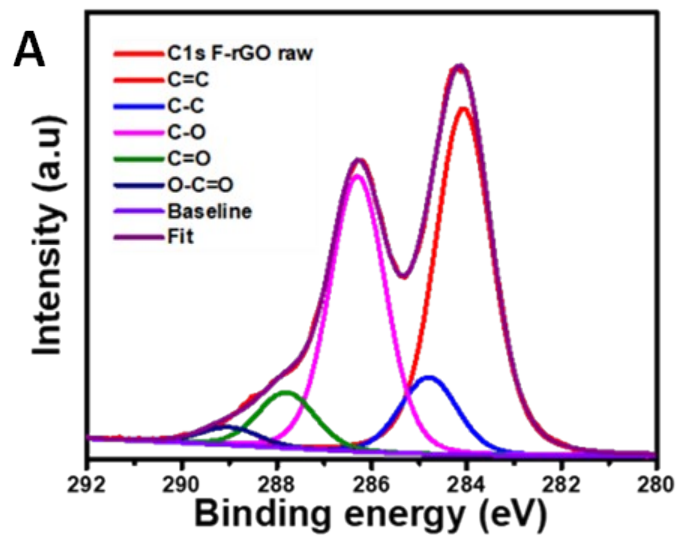

**Figure S2.** High resolution C1s X-ray photoelectron spectrum of the F-rGO.

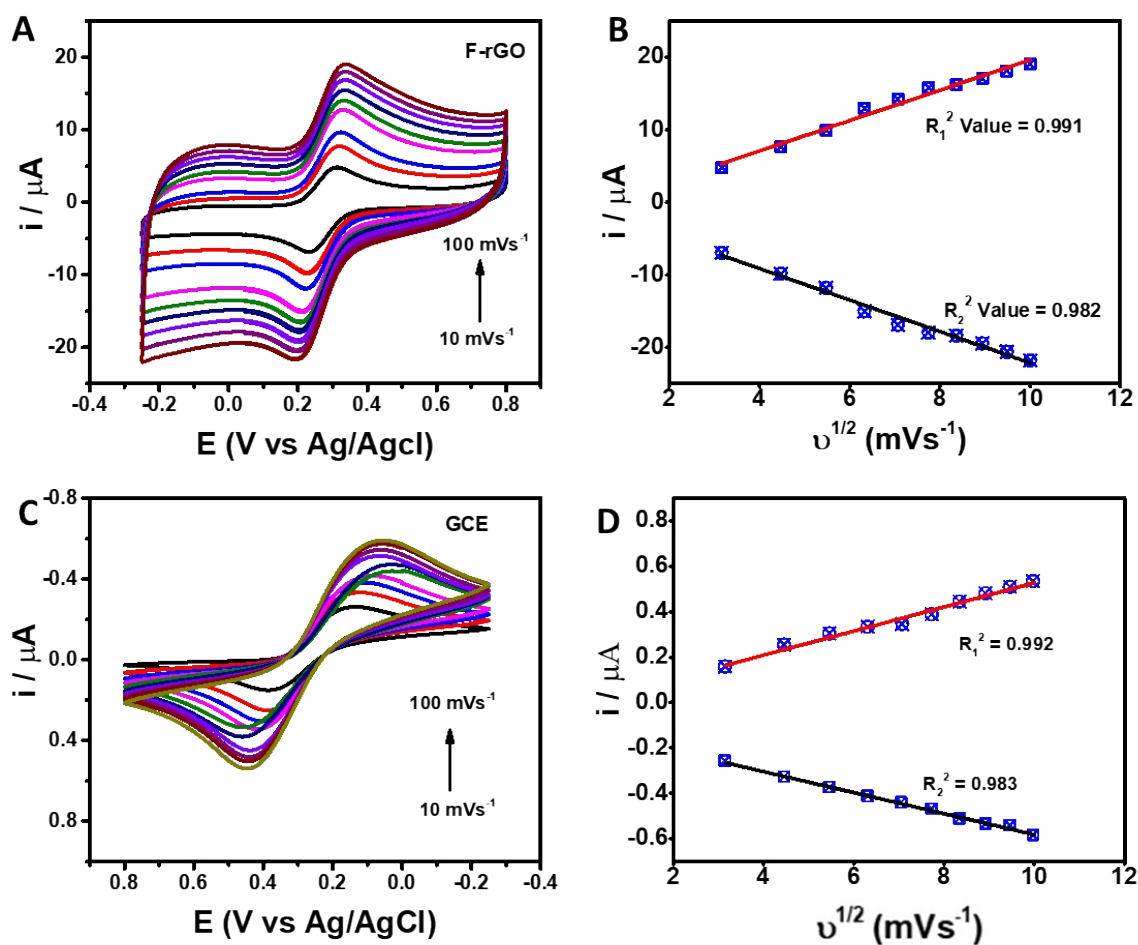

**Figure S3.** Cyclic voltammograms of the F-rGO/GCE (A) and the GCE (C) recorded in 0.1 M KCl containing 5.0 mM  $[\text{Fe}(\text{CN})_6]^{3-/4-}$  at the scan rates varying from 10 to 100  $\text{mV s}^{-1}$ . Plots of the redox peak currents vs. the squared root of the scan rate ( $\text{mVs}^{-1}$ ) for the F-rGO/GCE (B) and the GCE (D).

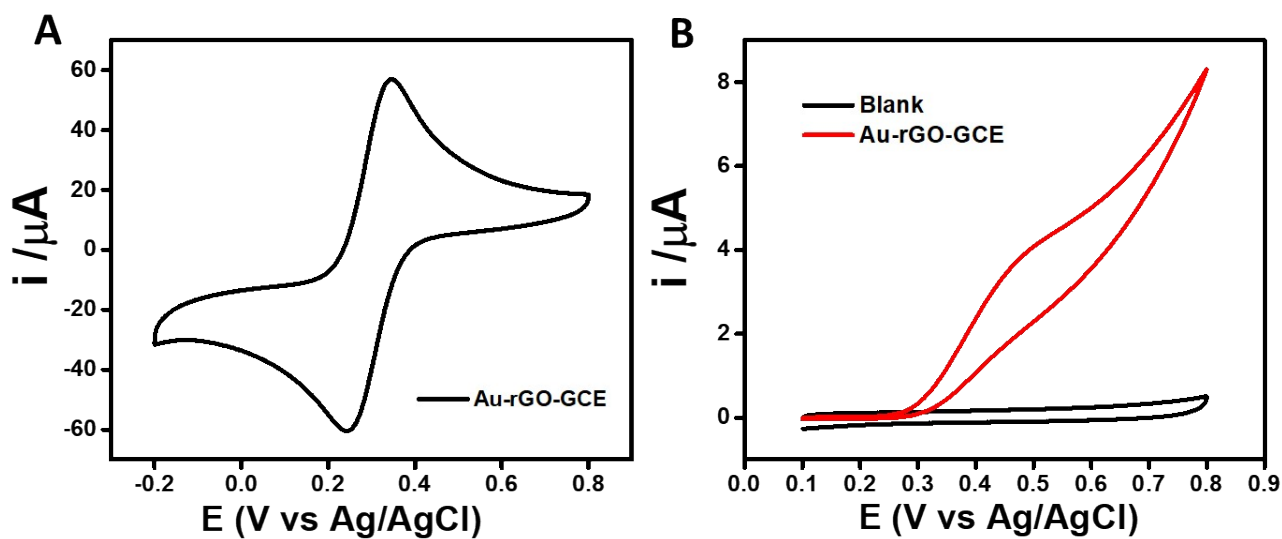

**Figure S4.** (A) Cyclic voltammogram (CV) of the Au/rGO/GCE recorded in 0.1 M KCl containing 5.0 mM  $[\text{Fe}(\text{CN})_6]^{3-/4-}$  at the scan rate of  $50 \text{ mVs}^{-1}$ . (B) CVs of the Au/rGO electrode recorded in 0.1M PBS at pH 7.4 in the absence (black) and in the presence of 100  $\mu\text{M}$  SMBS at a scan rate of  $50 \text{ mV s}^{-1}$ .

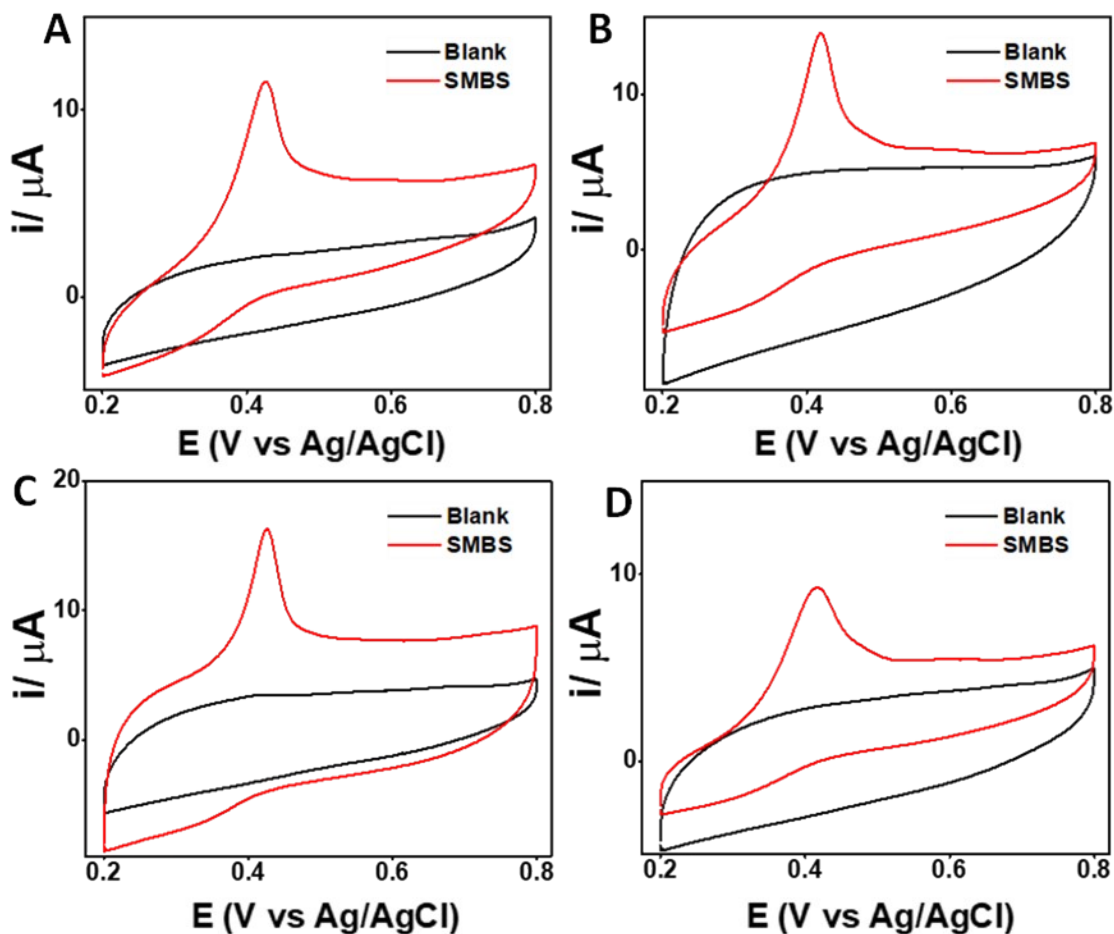

**Figure S5.** Effect of the electrochemical Au deposition time on the CVs of the Au/F-rGO/GCE recorded in 0.1 M PBS (pH 7.4) in the absence of (black) and in the presence of 100  $\mu\text{M}$  SMBS at the scan rate of  $50 \text{ mVs}^{-1}$ . The electrochemical deposition of Au was carried out in a 2 mM  $\text{AuCl}_3 + 0.1 \text{ M KNO}_3$  electrolyte at  $-0.4 \text{ V}$  (vs Ag/AgCl) for (A) 60 s, (B) 150 s, (C) 300 s and (D) 400 s.

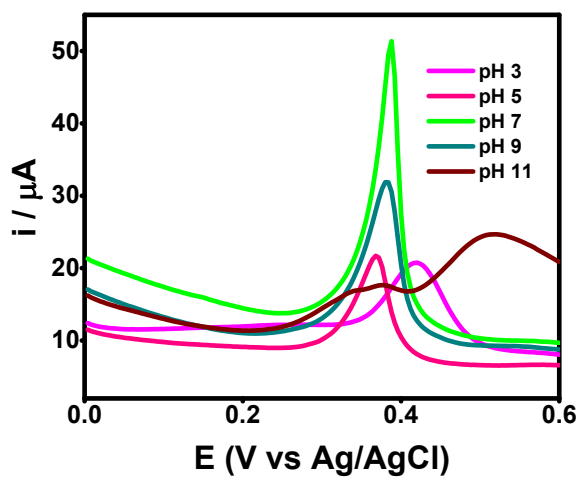

**Figure S6.** Effect of the pH of the electrolyte on the oxidation peak current at the Au/F-rGO/GCE obtained from the LSV recorded in 0.1 M PBS containing 100  $\mu\text{M}$  SMBS at the scan rate of 50  $\text{mVs}^{-1}$ .
